# Supplementary material for: Examining the nexus between medical education and complexity: a systematic review to inform practice and research.
Source: Research Square preprint supplement (doi:10.21203/rs.3.rs-2399365/v2), 2023-06-21
Supplement: Supplementary file 1 [file b5ae62dae3090b0f31a7895f.xlsx]

## Sheet: Sheet1
Included publication	Ref No.	Methodology	Complexity is: 1. The primary purpose of the publication is to advance the understanding of complexity in the context of medical education. 2. Used instrumentally in building commentary or theory, or to support empirical research, but not the primary focus. 3. An important aspect of the commentary or theory, or is used as a theoretical lens for empirical research, but is not central to it.	Sociomateriality	Complexity as a theoretical lens for medical education	Knowledge and Learning theories	Competency and capability	Curricular and program development	Faculty development	Program evaluation and medical education research	Professionalism and leadership	Assessment and admissions	Learning for systems: Interprofessional learning	Learning for systems: simulation based education	Learning about systems	Learning contexts and environments - graduate educationand CPD	Temporal observations
Aron DC. Developing a complex systems perspective for medical education to facilitate the integration of basic science and clinical medicine. J Eval Clin Pract. 2017; 23(2):460-466.	[25]	Conceptual	1
Arrow H, Henry KB. Using complexity to promote group learning in health care. J Eval Clin Pract. 2010; 16(4):861-866.	[26]	Conceptual	3
Batt AM, Williams B, Brydges M, Leyenaar M, Tavares W. New ways of seeing: supplementing existing competency framework development guidelines with systems thinking. Advances in Health Sciences Education : Theory and Practice. 2021; 26(4):1355-1371.	[27]	Conceptual	2
Berger S, Whelan B, Mahler C, Szecsenyi J, Krug K. Encountering complexity in collaborative learning activities: an exploratory case study with undergraduate health professionals. J Interprof Care. 2019; 33(5):490-496.	[28]	Empirical/Case study	3
Bleakley A, Cleland J. Sticking with Messy Realities: How 'Thinking with Complexity' can Inform Healthcare Education Research. In: Researching Medical Eduction. Edited by Cleland J, Durning SJ. UK: John Wiley and Sons; 2015.	[33]	Commentary	1
Bleakley A. Blunting Occam's razor: aligning medical education with studies of complexity. J Eval Clin Pract. 2010; 16(4):849-855.	[30]	Commentary	1
Bleakley A. Broadening conceptions of learning in medical education: the message from teamworking. Med Educ. 2006; 40(2):150-157.	[29]	Conceptual	1
Bleakley A. Team Process and Complexity Theory: Blunting Occam's Razor. In: Patient-Centred Medicine in Transition The Heart of the Matter. Edited by Lajoi S, Steinert Y. Switzerland: Springer International Publishing; 2014.	[32]	Conceptual	1
Bleakley A. The curriculum is dead! Long live the curriculum! Designing an undergraduate medicine and surgery curriculum for the future. Med Teach. 2012; 34(7):543-547.	[31]	Conceptual	2
Clark K, Hoffman A. Educating healthcare students: strategies to teach systems thinking to prepare new healthcare graduates. J Prof Nurs. 2019; 35(3):195-200.	[34]	Conceptual	3
Cleland J, Walker KG, Gale M, Nicol LG. Simulation-based education: understanding the socio-cultural complexity of a surgical training 'boot camp'. Med Educ. 2016; 50(8):829-841.	[35]	Empirical/Case study	3
Cleland JA, Patterson F, Hanson MD. Thinking of selection and widening access as complex and wicked problems. Med Educ. 2018; 52(12):1228-1239.	[36]	Conceptual	3
Cooper H, Braye S, Geyer R. Complexity and interprofessional education. Learning in Health and Social Care. 2004; 3(4):179-189.	[37]	Conceptual	1
Cooper H, Geyer R. Using 'complexity' for improving educational research in health care. Soc Sci Med. 2008; 67(1):177-182.	[38]	Conceptual	1
Cooper H, Spencer-Dawe E, McLean E. Beginning the process of teamwork: design, implementation and evaluation of an inter-professional education intervention for first year undergraduate students. J Interprof Care. 2005; 19(5):492-508.	[40]	Empirical/Program evaluation	3
Cooper H, Spencer-Dawe E. Involving service users in interprofessional education narrowing the gap between theory and practice. J Interprof Care. 2006; 20(6):603-617.	[39]	Empirical/Program evaluation	3
Cristancho S, Field E, Lingard L. What is the state of complexity science in medical education research? Med Educ. 2019; 53(2):95-104.	[42]	Literature review	1
Cristancho S. Fewer themes, more stories: shall we consider alternative ways for representing complexity well? Perspectives on Medical Education. 2014; 3(3):159-162.	[41]	Commentary	1
Cristancho SM, Helmich E. Rich pictures: a companion method for qualitative research in medical education. Med Educ. 2019; 53(9):916-924.	[43]	Conceptual	3
Davis B, Sumara D. ‘If things were simple . . .’: complexity in education. J Eval Clin Pract. 2010; 16(4):856-860.	[18]	Conceptual	1
Dickey J, Girard DE, Geheb MA, Cassel CK. Using systems-based practice to integrate education and clinical services. Med Teach. 2004; 26(5):428-434.	[44]	Empirical/Case study	3
Doll Jr WE, Trueit D. Complexity and the health care professions. J Eval Clin Pract. 2010; 16(4):841-848.	[45]	Commentary	1
Dornan T, Lee C, Findlay-White F, Gillespie H, Conn R. Acting wisely in complex clinical situations: ‘mutual safety’ for clinicians as well as patients. Med Teach. 2021; 43(12):1419-1429.	[46]	Conceptual	2
Durning SJ, Artino Jr AR, Pangaro LN, van der Vleuten C, Schuwirth L. Perspective: redefining context in the clinical encounter: implications for research and training in medical education. Acad Med. 2010; 85(5):894-901.	[47]	Conceptual	3
Durning SJ, Lubarsky S, Torre D, Dory V, Holmboe E. Considering “nonlinearity” across the continuum in medical education assessment: supporting theory, practice, and future research directions. J Contin Educ Health Prof. 2015; 35(3):232-243.	[48]	Conceptual	2
Fenwick T, Dahlgren MA. Towards socio-material approaches in simulation-based education: lessons from complexity theory. Med Educ. 2015; 49(4):359-367.	[51]	Conceptual	1
Fenwick T. Complexity science and professional learning for collaboration: a critical reconsideration of possibilities and limitations. Journal of Education and Work. 2012; 25(1):141-162.	[49]	Commentary	1
Fenwick T. Sociomateriality in medical practice and learning: attuning to what matters. Med Educ. 2014; 48(1):44-52.	[50]	Conceptual	2
Fernandez N, Audetat MC. Faculty development program evaluation: a need to embrace complexity. Advances in Medical Education and Practice. 2019; 10:191-199.	[52]	Conceptual	2
Frank JR, Snell LS, Oswald A, Hauer KE, & for the International CBME Collaborators. Further on the journey in a complex adaptive system: elaborating CBME. Med Teach. 2021; 43(7):734-736.	[53]	Commentary	2
Fraser SW, Greenhalgh T. Coping with complexity: educating for capability. BMJ. 2001; 323(7316):799-803.	[54]	Commentary	1
Frye AW, Hemmer PA. Program evaluation models and related theories: AMEE Guide No. 67 -complexity. Med Teach. 2012; 34(5):e288-e299.	[55]	Conceptual	2
Glynn LG, Scully R. The edge of chaos: reductionism in healthcare and health professional training. Int J Clin Pract. 2010; 64(6):669-672.	[56]	Commentary	1
Goldman EF, Mintz ML. Using Concepts from Complexity Science to Accelerate Curricular Revision. Innovative Higher Education. 2017; 42(5-6):437-449.	[57]	Conceptual	1
Goldszmidt M. When I say ... Sociomateriality. Med Educ. 2017; 51(5):465-466.	[58]	Commentary	3
Gonnering RS. Complexity theory and the "puzzling" competencies: systems-based Practice And Practice-based Learning explored. J Surg Educ. 2010; 67(2):122-124.	[59]	Commentary	2
Gonzalo JD, Caverzagie KJ, Hawkins RE, Lawson L, Wolpaw DR, Chang A. Concerns and responses for integrating health systems science Into medical education. Acad Med. 2017; 96(6):843-849.	[60]	Conceptual	3
Gonzalo JD, Haidet P, Papp KK, Wolpaw DR, Moser E, Wittenstein RD, Wolpaw T. Educating for the 21st-century health care system: an interdependent framework of basic, clinical, and systems sciences. Acad Med. 2017; 92(1):35-39.	[62]	Conceptual	3
Gonzalo JD, Ogrinc G. Health systems science: the "broccoli" of undergraduate medical education. Acad Med. 2019; 94(10):1425-1432.	[63]	Conceptual	3
Gonzalo JD, Wolpaw DR, Cooney R, Mazotti L, Reilly JB, Wolpaw T. Evolving the Systems-Based Practice Competency in Graduate Medical Education to Meet Patient Needs in the 21st-Century Health Care System. Acad Med. 2022; 97(5):655-661.	[61]	Conceptual	3
Gordon L, Cleland JA. Change is never easy: how management theories can help operationalise change in medical education. Med Educ. 2021; 55(1):55-64.	[64]	Conceptual	2
Gordon L, Rees C, Ker J, Cleland J. Using video-reflexive ethnography to capture the complexity of leadership enactment in the healthcare workplace. Advances in Health Sciences Education : Theory and Practice. 2017; 22(5):1101-1121.	[65]	Empirical/Case study	3
Gormley GJ, Fenwick T. Learning to manage complexity through simulation: students' challenges and possible strategies. Perspectives on Medical Education. 2016; 5(3):138-146.	[66]	Empirical/Intervention	2
Hafferty F, Levinson D. Moving beyond nostalgia and motives: towards a complexity science view of medical professionalism. Perspect Biol Med. 2008; 51(4):599-615.	[67]	Conceptual	2
Hafferty FW, Castellani B. The increasing complexities of professionalism. Acad Med. 2010; 85(2):288-301.	[68]	Conceptual	2
Hall P, Weaver L, Grassau PA. Theories, relationships and interprofessionalism: learning to weave. Journal of Interprofessional Care. 2013; 27(1):73-80.	[69]	Conceptual	3
Hill F, Stephens C. Building leadership capacity in medical education: developing the potential of course coordinators. Med Teach. 2005; 27(2):145-149.	[70]	Empirical/Case study	2
Jorm C, Nisbet G, Roberts C, Gordon C, Gentilcore S, Chen TF. Using complexity theory to develop a student-directed interprofessional learning activity for 1220 healthcare students. BMC Med Educ. 2016; 16:199.	[71]	Empirical/Program evaluation	2
Jorm C, Roberts C. Using complexity theory to guide medical school evaluations. Acad Med. 2018; 93(3):399-405.	[72]	Conceptual	1
Khanna P, Roberts C, Lane AS. Designing health professional education curricula using systems thinking perspectives. BMC Med Educ. 2021; 21(1):20.	[73]	Conceptual	2
Lim D, Schoo A, Lawn S, Litt J. Embedding and sustaining motivational interviewing in clinical environments: a concurrent iterative mixed methods study. BMC Med Educ. 2019; 19(1):164.	[74]	Empirical/Qualitative	3
Ma IWY. Embracing complexity: taking the messiness in simulation-based training one step further. Med Educ. 2015; 49(4):346-348.	[75]	Commentary	1
McLellan L, Yardley S, Norris B, de Bruin A, Tully M, Dornan T. Preparing to prescribe: How do clerkship students learn in the midst of complexity? Adv in Health Sci Educ 2015; 20(5):1339-1354.	[76]	Empirical/literature review and qualitative	3
McMurtry A, Rohse S, Kilgour KN. Socio-material perspectives on interprofessional team and collaborative learning. Med Educ. 2016; 50(2):169-180.	[78]	Conceptual	3
McMurtry A. Complexity, collective learning and the education of interprofessional health teams: insights from a university-level course. J Interprof Care. 2010; 24(3):220-229.	[77]	Empirical/Case study	2
Mennin S. Complexity and health professions education. J Eval Clin Pract. 2010; 16(4):835-837.	[80]	Commentary	1
Mennin S. Self-organisation, integration and curriculum in the complex world of medical education. Med Educ. 2010; 44(1):20-30.	[81]	Conceptual	2
Mennin S. Small-group problem-based learning as a complex adaptive system. Teaching and Teacher Education. 2007; 23(3):303-313.	[79]	Conceptual	2
Mennin SP. Health Professions Education: Complexity, Teaching, and Learning. In: Handbook of Systems and Complexity in Health. Edited by Sturmberg JP, Martin CM. New York: Springer; 2013: 755-766.	[82]	Conceptual	1
Norman C. Teaching systems thinking and complexity theory in health sciences. J Eval Clin Pract. 2013; 19(6):1087-1089.	[83]	Empirical/Case study	1
Norman G. Chaos, complexity and complicatedness: lessons from rocket science. Med Educ. 2011; 45(6):549-559.	[84]	Commentary	1
Papanagnou D, Watkins KE, Lundgren H, Alcid GA, Ziring D, Marsick VJ. Informal and incidental learning in the clinical learning environment: learning through complexity and uncertainty during COVID-19. Acad Med. 2022; 97(8):1138-1143.	[85]	Conceptual	2
Prather SE, Jones DN. Physician leadership: influence on practice‐based learning and improvement. J Contin Educ Health Prof. 2003; 23(S1):S63-S72.	[86]	Conceptual	3
Rees C, Richards L. Outcomes-based education versus coping with complexity: should we be educating for capability? Med Educ. 2004; 38(11):1203-1203.	[87]	Commentary	1
Regehr G. Highway spotters and traffic controllers: further reflections on complexity. Med Educ. 2011; 45(6):542-543.	[89]	Commentary	2
Regehr G. It’s NOT rocket science: rethinking our metaphors for research in health professions education. Med Educ. 2010; 44(1):31-39.	[88]	Commentary	3
Rojas D, Grierson L, Mylopoulos M, Trbovich P, Bagli D, Brydges R. How can systems engineering inform the methods of programme evaluation in health professions education? Med Educ. 2018; 52(4):364-375.	[90]	Conceptual	2
Sargeant J, Wong BM, Campbell CM. CPD of the future: a partnership between quality improvement and competency‐based education. Medical education. 2018 Jan;52(1):125-35.	[92]	Conceptual	2
Sargeant J. Theories to aid understanding and implementation of interprofessional education. J Contin Educ Health Prof. 2009; 29(3):178-184.	[91]	Conceptual	2
Sawyer NT, Danielson A, Johl K, Williams DM. Introduction to health systems science: experiential learning through patient interviews in the emergency department. AEM Education and Training. 2021; 5(2):e10512.	[93]	Empirical/Program evaluation	2
Schoo A, Kumar K. The clinical educator and complexity: a review. Clin Teach. 2018; 15:287-293.	[94]	Conceptual	2
Smith CS, Francovich C, Morris M, Hill W, Langlois-Winkle F, Rupper R, Roth C et al. Toward an ecological perspective of resident teaching clinic. Adv in Health Sci Educ. 2010; 15(5):771-778.	[95]	Conceptual	2
Solomon P, Risdon C. A process oriented approach to promoting collaborative practice: incorporating complexity methods. Med Teach. 2014; 36(9):821-824.	[96]	Empirical/Program evaluation	2
Sturmberg J, Hinchy J. Borderline competence – from a complexity perspective: conceptualization and implementation for certifying examinations. J Eval Clin Pract. 2010; 16(4):867-872.	[97]	Conceptual	2
Sturmberg J, Martin C. Knowing – in Medicine. J Eval Clin Pract. 2008; 14(5):767-770.	[98]	Conceptual	2
Swanson RC, Cattaneo A, Bradley E, Chunharas S, Atun R, Abbas KM, Katsaliaki K et al. Rethinking health systems strengthening: key systems thinking tools and strategies for transformational change. Health Policy Plan. 2012; 27(Suppl 4):iv54-iv61.	[99]	Conceptual	3
Talbot M. Good wine may need to mature: a critique of accelerated higher specialist training. Evidence from cognitive neuroscience. Med Educ. 2004; 38(4):399-408.	[100]	Commentary	3
Thompson DS, Abourbih J, Carter L, Adams-Carpino G, Berry S, Graves LE, Ranger NJ. Views from the field: medical student experiences and perceptions of interprofessional learning and collaboration in rural settings. J Interprof Care. 2018; 32(3):339-347.	[101]	Empirical/Program evaluation	3
Torre D, Schuwirth L, Van der Vleuten C, Heeneman S. An international study on the implementation of programmatic assessment: understanding challenges and exploring solutions. Med Teach. 2022; 44(8):928-937.	[102]	Empirical/Case study	3
van Rossum TR, Scheele F, Scherpbier AJ, Sluiter HE, Heyligers IC. Dealing with the complex dynamics of teaching hospitals. BMC Med Educ. 2016; 16(1):1-5.	[103]	Conceptual	2
Van Schalkwyk SC, Couper ID, Blitz J, De Villiers MR. A framework for distributed health professions training: using participatory action research to build consensus. BMC Med Educ. 2020; 20(1):154.	[104]	Empirical/Participatory action research	2
Weaver L, McMurtry A, Conklin J, Brajtman S, Hall P. Harnessing complexity science for interprofessional education development: a case study. Journal of Research in Interprofessional Practice and education. 2011; 2(1).	[105]	Empirical/Case study	2
Woodruff JN. Accounting for complexity in medical education: a model of adaptive behaviour in medicine. Med Educ. 2019; 53(9):861-873.	[106]	Conceptual	2
