# Supplementary material for: Examining the nexus between medical education and complexity: a systematic review to inform practice and research.
Source: Research Square preprint supplement (doi:10.21203/rs.3.rs-2399365/v2), 2023-06-21
Supplement: Supplementary file 2 [file c988eb59fa86c9565f7300ac.docx]

Table 1 PRISMA 2020 item checklist

| Section and topic | Item # | Checklist item | Location where item is reported |
| --- | --- | --- | --- |
| **Title** |  |  |  |
| Title | 1 | Identify the report as a systematic review. | Title, para 1, page 1 |
| **Abstract** |  |  |  |
| Abstract | 2 | See the PRISMA 2020 for Abstracts checklist (table 2). | See Table 2 (below) |
| **Introduction** |  |  |  |
| Rationale | 3 | Describe the rationale for the review in the context of existing knowledge. | Background, paragraph 2 (quote is considered paragraph 1), page 5 |
| Objectives | 4 | Provide an explicit statement of the objective(s) or question(s) the review addresses. | Background, paragraph 7, page 7 |
| **Methods** |  |  |  |
| Eligibility criteria | 5 | Specify the inclusion and exclusion criteria for the review and how studies were grouped for the syntheses. | Methods, paragraph 4 and 5, page 10 |
| Information sources | 6 | Specify all databases, registers, websites, organisations, reference lists and other sources searched or consulted to identify studies. Specify the date when each source was last searched or consulted. | Methods, Table 1 page 9 |
| Search strategy | 7 | Present the full search strategies for all databases, registers and websites, including any filters and limits used. | Methods, Table 1 page 9 |
| Selection process | 8 | Specify the methods used to decide whether a study met the inclusion criteria of the review, including how many reviewers screened each record and each report retrieved, whether they worked independently, and if applicable, details of automation tools used in the process. | Methods, paragraph 3, page 9 |
| Data collection process | 9 | Specify the methods used to collect data from reports, including how many reviewers collected data from each report, whether they worked independently, any processes for obtaining or confirming data from study investigators, and if applicable, details of automation tools used in the process. | Methods, paragraph 6, page 11 |
| Data items | 10a | List and define all outcomes for which data were sought. Specify whether all results that were compatible with each outcome domain in each study were sought (e.g. for all measures, time points, analyses), and if not, the methods used to decide which results to collect. | Not applicable |
| 10b | List and define all other variables for which data were sought (e.g. participant and intervention characteristics, funding sources). Describe any assumptions made about any missing or unclear information. | Methods, paragraph 6, page 11 (bibliographic information). Otherwise only qualitative data was collected. |
| Study risk of bias assessment | 11 | Specify the methods used to assess risk of bias in the included studies, including details of the tool(s) used, how many reviewers assessed each study and whether they worked independently, and if applicable, details of automation tools used in the process. | Not applicable. The review included a mix of commentary, theoretical papers and some empirical research. The results of the empirical research papers were not of interest, the topics studied were. Therefore risk of bias assessment was not possible (commentary etc) or necessary (research papers).  Methods, paragraph 6 page 11. |
| Effect measures | 12 | Specify for each outcome the effect measure(s) (e.g. risk ratio, mean difference) used in the synthesis or presentation of results. | Not applicable |
| Synthesis methods | 13a | Describe the processes used to decide which studies were eligible for each synthesis (e.g. tabulating the study intervention characteristics and comparing against the planned groups for each synthesis (item #5)). | Not applicable |
| 13b | Describe any methods required to prepare the data for presentation or synthesis, such as handling of missing summary statistics, or data conversions. | Not applicable |
| 13c | Describe any methods used to tabulate or visually display results of individual studies and syntheses. | Additional materials 2: Publications mapped to themes and narratives |
| 13d | Describe any methods used to synthesise results and provide a rationale for the choice(s). If meta-analysis was performed, describe the model(s), method(s) to identify the presence and extent of statistical heterogeneity, and software package(s) used. | Methods, paragraph 6, pages 11 |
| 13e | Describe any methods used to explore possible causes of heterogeneity among study results (e.g. subgroup analysis, meta-regression). | Not applicable |
| 13f | Describe any sensitivity analyses conducted to assess robustness of the synthesised results. | Not applicable |
| Reporting bias assessment | 14 | Describe any methods used to assess risk of bias due to missing results in a synthesis (arising from reporting biases). | Not applicable |
| Certainty assessment | 15 | Describe any methods used to assess certainty (or confidence) in the body of evidence for an outcome. | Not applicable |
| **Results** |  |  |  |
| Study selection | 16a | Describe the results of the search and selection process, from the number of records identified in the search to the number of studies included in the review, ideally using a flow diagram. | Results, paragraph 1, page 9  Additional Materials 1 |
| 16b | Cite studies that might appear to meet the inclusion criteria, but which were excluded, and explain why they were excluded. | No papers are cited, the issue is addressed generally in Discussion, paragraph 3, page 28 |
| Study characteristics | 17 | Cite each included study and present its characteristics. | Not applicable |
| Risk of bias in studies | 18 | Present assessments of risk of bias for each included study. | Not applicable |
| Results of individual studies | 19 | For all outcomes, present, for each study: (a) summary statistics for each group (where appropriate) and (b) an effect estimate and its precision (e.g. confidence/credible interval), ideally using structured tables or plots. | Not applicable |
| Results of syntheses | 20a | For each synthesis, briefly summarise the characteristics and risk of bias among contributing studies. | Not applicable |
| 20b | Present results of all statistical syntheses conducted. If meta-analysis was done, present for each the summary estimate and its precision (e.g. confidence/credible interval) and measures of statistical heterogeneity. If comparing groups, describe the direction of the effect. | Not applicable. Statistical analyses were not performed. Results of qualitative synthesis are described in the results section. |
| 20c | Present results of all investigations of possible causes of heterogeneity among study results. | Not applicable |
| 20d | Present results of all sensitivity analyses conducted to assess the robustness of the synthesised results. | Not applicable |
| Reporting biases | 21 | Present assessments of risk of bias due to missing results (arising from reporting biases) for each synthesis assessed. | Not applicable |
| Certainty of evidence | 22 | Present assessments of certainty (or confidence) in the body of evidence for each outcome assessed. | Not applicable |
| **Discussion** |  |  |  |
| Discussion | 23a | Provide a general interpretation of the results in the context of other evidence. | Discussion, paragraph 1, page 27 |
| 23b | Discuss any limitations of the evidence included in the review. | Discussion, paragraph 3, page 28-23 |
| 23c | Discuss any limitations of the review processes used. | Discussion, paragraph 3, page 28 |
| 23d | Discuss implications of the results for practice, policy, and future research. | Conclusion, paragraph 1, page 27 |
| **Other information** |  |  |  |
| Registration and protocol | 24a | Provide registration information for the review, including register name and registration number, or state that the review was not registered. | Not eligible for inclusion on Prospero, no other relevant registration database was identified. |
| 24b | Indicate where the review protocol can be accessed, or state that a protocol was not prepared. | Protocol was not formally prepared. |
| 24c | Describe and explain any amendments to information provided at registration or in the protocol. | Not applicable |
| Support | 25 | Describe sources of financial or non-financial support for the review, and the role of the funders or sponsors in the review. | Nil funding or non-financial support |
| Competing interests | 26 | Declare any competing interests of review authors. | The authors declare no competing interests |
| Availability of data, code, and other materials | 27 | Report which of the following are publicly available and where they can be found: template data collection forms; data extracted from included studies; data used for all analyses; analytic code; any other materials used in the review. | Collated qualitative data is available on reasonable request |

Table 2 PRISMA 202 for Abstracts Abstract checklist

| **Section and topic** | **Item #** | **Checklist item** |  |
| --- | --- | --- | --- |
| **Title** |  |  |  |
| Title | 1 | Identify the report as a systematic review. | Para 1 |
| **Background** |  |  |  |
| Objectives | 2 | Provide an explicit statement of the main objective(s) or question(s) the review addresses. | Abstract, paragraph 1 |
| **Methods** |  |  |  |
| Eligibility criteria | 3 | Specify the inclusion and exclusion criteria for the review. | Abstract, paragraph 2 |
| Information sources | 4 | Specify the information sources (e.g. databases, registers) used to identify studies and the date when each was last searched. | Abstract, paragraph 2 |
| Risk of bias | 5 | Specify the methods used to assess risk of bias in the included studies. | Not applicable |
| Synthesis of results | 6 | Specify the methods used to present and synthesise results. | Abstract, paragraph 2 |
| **Results** |  |  |  |
| Included studies | 7 | Give the total number of included studies and participants and summarise relevant characteristics of studies. | Abstract, paragraph 3 |
| Synthesis of results | 8 | Present results for main outcomes, preferably indicating the number of included studies and participants for each. If meta-analysis was done, report the summary estimate and confidence/credible interval. If comparing groups, indicate the direction of the effect (i.e. which group is favoured). | Abstract, paragraph 3 |
| **Discussion** |  |  |  |
| Limitations of evidence | 9 | Provide a brief summary of the limitations of the evidence included in the review (e.g. study risk of bias, inconsistency and imprecision). | Abstract, paragraph 3 |
| Interpretation | 10 | Provide a general interpretation of the results and important implications. | Abstract, paragraph 3 & 4 |
| **Other** |  |  |  |
| Funding | 11 | Specify the primary source of funding for the review. | N/A |
| Registration | 12 | Provide the register name and registration number. | Methods, paragraph 1 (Not eligible for inclusion in the Prospero) |

[Considering methodological options for reviews of theory](https://systematicreviewsjournal.biomedcentral.com/articles/10.1186/2046-4053-3-114) (adapted from Campbell et. al.*)

| **Review stage** | **Systematic review** | **Challenge for review of the use of complexity theory/science in medical education** | **Our resolution** |
| --- | --- | --- | --- |
| Inclusion criteria | Emphasis on setting *a priori* criteria specifying population, intervention, comparison, outcome, and study (PICOS) design; or SPIDER [[20](https://systematicreviewsjournal.biomedcentral.com/articles/10.1186/2046-4053-3-114#ref-CR20)] for reviews of qualitative data. | The review does not relate to an intervention, so inclusion criteria based on PICOS is not relevant. Rather the review is inductive, generating information to support the use of complexity in medical education. | To be included a publication had to engage genuinely with complexity theory/science and relate significantly to medical education. All types of publications were accepted, including non-empirical papers such as review, commentary and theoretical papers. |
| Literature search | Generally strong focus on searches of electronic bibliographic databases, requiring clear search terms. | The review was conducted in the context of a PhD project, and was iterative over a period time to enable the authors to become familiar with the relevant body of literature over time. It was only after familiarisation with the body of literature that a formal systematic search was conducted. | The initial search was iterative, over time, using broad terms and reference scanning. A systematic search was then conducted using multiple relevant databases to ensure all significant papers had been identified. Due to the nature of the research question search terms were broad and resulted in a large number of papers to be screened. Screening from titles and abstracts was able to exclude a large number of papers, full text review was required for many however for the vast majority this resulted in a clear decision to include or exclude. There were a small number of papers for which a judgement was made with acknowledgement that a different researcher may have made a different decision. |
| Data extraction | Standardised forms and software (e.g. RevMan) available | Determining what information is required to extract and how best to extract this uniformly. Various methods possible. | Information relating to the purpose for, and manner by which, authors were using complexity was extracted and thematically grouped using standard qualitative techniques and software. |
| Quality appraisal | Appraisal of clear reporting of empirical study methods to enable assessment of potential biases, and the generalisability of the study results. | Tools developed for appraising conventional systematic reviews focus on internal validity and study design. | The review did not include a standardised critical appraisal of the papers included as the majority of them were commentary or theoretical. Empirical papers that were included were not appraised because their quality was not relevant to the research question – the way that researchers used complexity theory was what was important to the review, not the outcome of their empirical research. |
| Synthesis | Various methods, including meta-analysis of suitably homogeneous data and narrative synthesis to explore heterogeneity between studies. | Summarising the manner in which complexity theory is used in the context of medical education, rather than empirical findings | Synthesis of data using qualitative techniques to demonstrate in both conceptual and narrative form the introduction, development, extend and manner of the use of complexity theory/science in medical education |

*Campbell, M., Egan, M., Lorenc, T., Bond, L., Popham, F., Fenton, C., & Benzeval, M. (2014). Considering methodological options for reviews of theory: illustrated by a review of theories linking income and health. *Systematic reviews*, *3*, 1-11.
